# Supplementary material for: A Single Intravenous Injection of AAV-PHP.B-hNDUFS4 Ameliorates the Phenotype of Ndufs4−/− Mice
Source: PubMed Central journal article supplement — Mol Ther Methods Clin Dev. 2020 May 4;17:1071–8. doi: 10.1016/j.omtm.2020.04.026 (PMC7248291; doi:10.1016/j.omtm.2020.04.026), 2020-05-04

OMTM, Volume 17

## Supplemental Information

### **A Single Intravenous Injection of AAV-PHP.B-*hNDUFS4* Ameliorates the Phenotype of *Ndufs4*<sup>-/-</sup> Mice**

**Pedro Silva-Pinheiro, Raffaele Cerutti, Marta Luna-Sanchez, Massimo Zeviani, and Carlo Viscomi**

## Supplemental Material

**Supplemental Figure 1.** Scattered CD68-positive cells in the posterior cerebellar posterior lobule. Scale bars, 10  $\mu$ m.

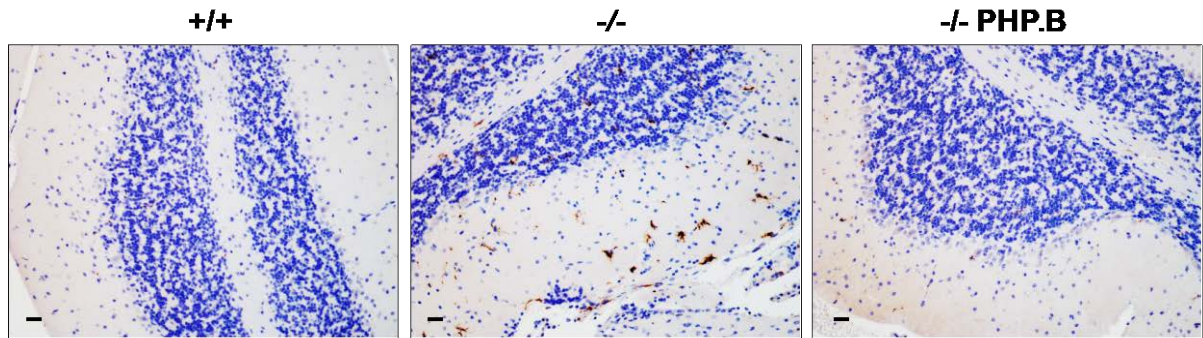

**Supplemental Figure 2.** Characterization of the dentate gyrus of the hippocampus.

**A)** Immunodecoration with antiNDUFS4 antibody. Scale bars, 10  $\mu\text{m}$ .

**B)** PathoGreen staining. Scale bars, 20  $\mu\text{m}$ .

**C)** H&E staining. Scale bars, 10  $\mu\text{m}$ .

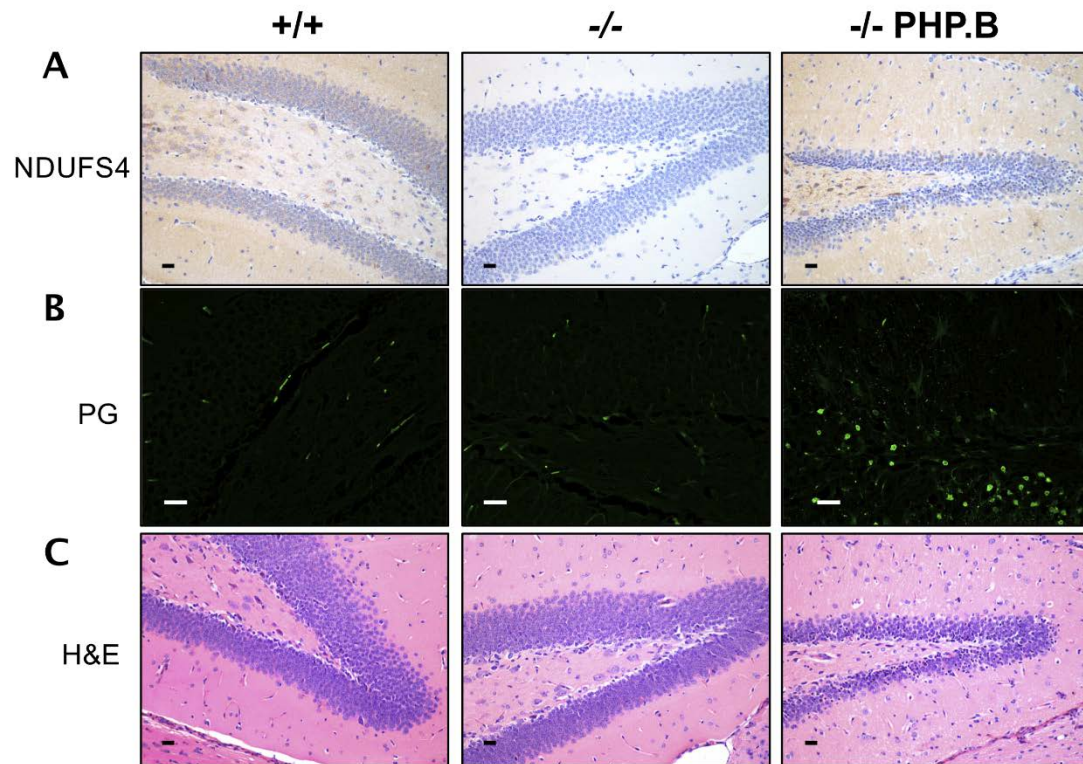

**Supplemental Figure 3.** Massively enlarged stomach of AAV-PHP.B-*hNDUFS4* mice.

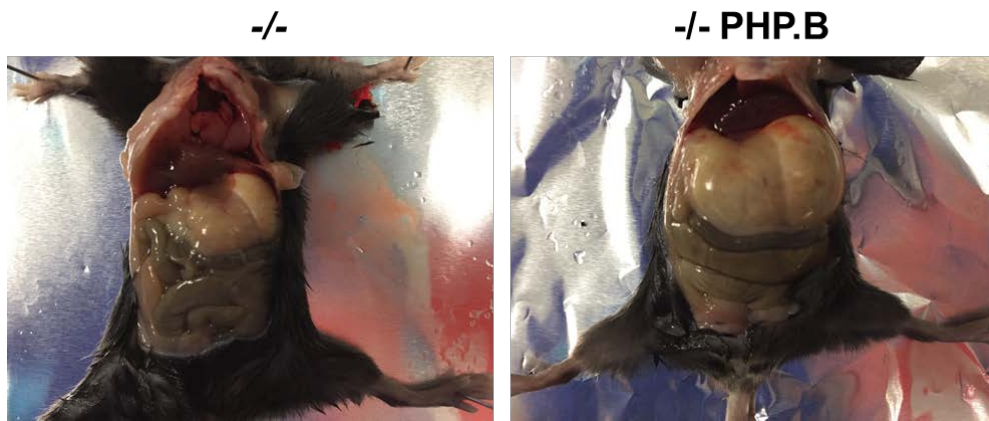

**Supplemental Figure 4.** Massive neurodegeneration in the pre-optic area of a *Ndufs4*<sup>-/-</sup> mouse sacrificed because of poor clinical conditions.

A) H&E staining. Scale bars, 10  $\mu$ m.

B) PathoGreen staining. Scale bars, 20  $\mu$ m.

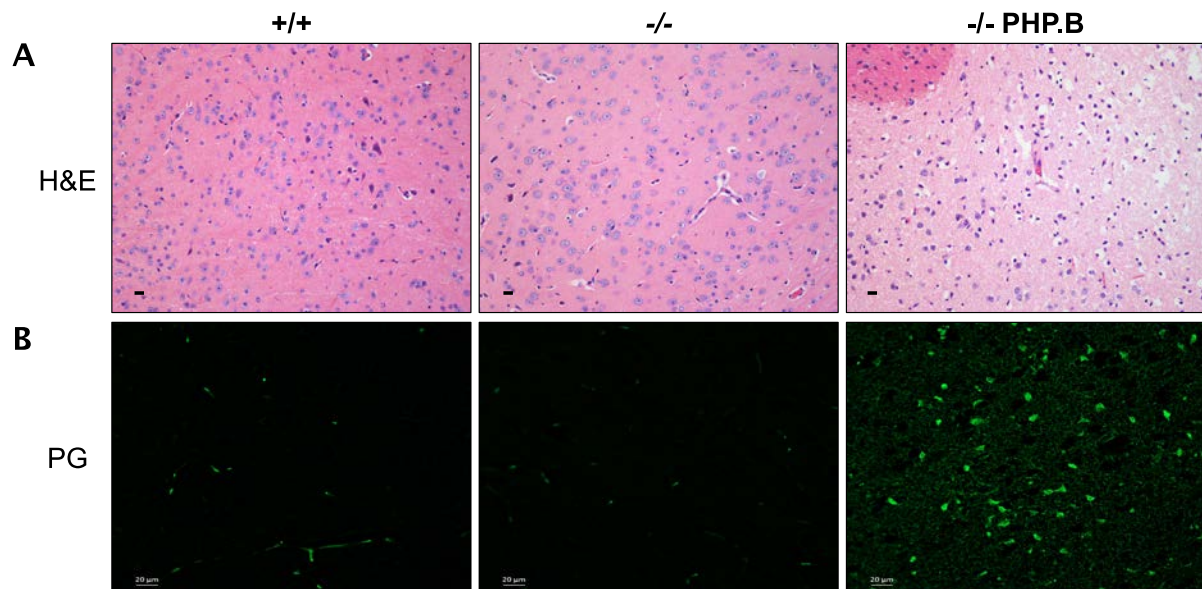

**Supplemental Figure 5.** Western-blot immunovisualisation of LY6A protein in brain homogenates of newborn (P1) and P30 mice. CBB: Coomassie brilliant blue staining;  $\beta$ -tubulin was used as an internal standard for protein loading.

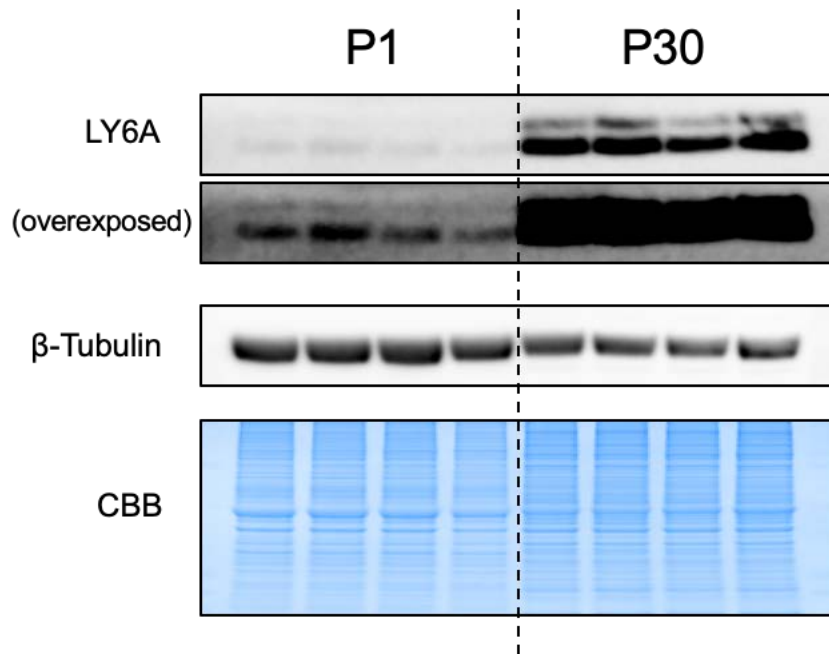

Supplement: mmc1.pdf [file mmc1.pdf]
